# Supplementary material
Source: Springer Nature journal article supplement (https://www.springermedizin.de/resource/supplementary/12889_2011_3868_MOESM1_ESM.pdf/9492132)
Supplement: MOESM1 [file 9492132]

## **Domains of Adherence [11]**

- Social and economic factors
- Patient-related factors
- Condition-related factors
- Therapy-related factors
- Health care team and system-related factors
